# Supplementary material
Source: Springer Nature journal article supplement (https://www.springermedizin.de/resource/supplementary/13223_2009_93_MOESM2_ESM.pdf/9597244)
Supplement: MOESM2 [file 9597244]

| Case                                | AR  | AR Rx                | ACE intol. | Weeks of Tx Before Symptoms                               | Sitagliptin – Related Symptoms |                       |                    |         | Discontinuing Sitagliptin |             | Sitagliptin Challenge |         |
|-------------------------------------|-----|----------------------|------------|-----------------------------------------------------------|--------------------------------|-----------------------|--------------------|---------|---------------------------|-------------|-----------------------|---------|
|                                     |     |                      |            |                                                           | Cough                          | Ant./Post. Rhinorrhea | Wheeze/ Dyspnea    | Fatigue | Weeks to Resolution       | %Δ PEFR     | Symptoms              | %Δ PEFR |
| <b>Sitagliptin Intolerant Group</b> |     |                      |            |                                                           |                                |                       |                    |         |                           |             |                       |         |
| 1                                   | Yes | Yes                  | Yes        | n.d.                                                      | Yes                            | Yes                   | Yes                | Yes     | 1 week                    | 38%         | Positive              | 30%     |
| 2                                   | Yes | Yes                  | Yes        | n.d.                                                      | Yes                            | Yes                   | Yes                | Yes     | 1 week                    | 49%         | Positive              | 19%     |
| 3                                   | Yes | Yes                  | Yes        | 7 weeks                                                   | Yes                            | Yes                   | Yes                | Yes     | n.d.                      | Restriction | Positive              | n.d.    |
| 4                                   | Yes | nil                  | nil        | 8 weeks                                                   | Yes                            | Yes                   | Yes                | Yes     | 1 week                    | n.d.        | Positive              | 11%     |
| 5                                   | Yes | Yes                  | nil        | 1 week                                                    | Yes                            | Yes                   | Yes                | Yes     | 1 week                    | 33%         | INS+ICS               | 0%      |
| 6                                   | Yes | Yes                  | Yes        | 2 weeks                                                   | Yes                            | Yes                   | Yes                | Yes     | 1 week                    | 31%         | n.d.                  | n.d.    |
| 7                                   | Yes | nil                  | nil        | n.d.                                                      | Yes                            | Yes                   | Yes                | Yes     | 1 week                    | 17%         | n.d.                  | n.d.    |
| 8                                   | Yes | Yes                  | No Rx      | 2 weeks                                                   | nil                            | Yes                   | nil                | Yes     | 1 week                    | n.d.        | n.d.                  | n.d.    |
| 9                                   | Yes | Yes                  | nil        | 4 weeks                                                   | Yes                            | Yes                   | Yes                | Yes     | 1 week                    | Restriction | n.d.                  | n.d.    |
| 10                                  | Yes | Yes                  | nil        | 54 weeks                                                  | Yes                            | Yes                   | nil                | Yes     | 1 week                    | Restriction | n.d.                  | n.d.    |
| 11                                  | Yes | Yes                  | nil        | 2 weeks                                                   | nil                            | Yes                   | nil                | nil     | 1 week                    | 80% pred    | Positive              | n.d.    |
| 12                                  | Yes | Yes                  | Yes        | 1 week                                                    | Yes                            | Yes                   | Yes                | Yes     | 1 week                    | Restriction | n.d.                  | n.d.    |
| 13                                  | Yes | Yes                  | No Rx      | n.d.                                                      | Yes                            | Yes                   | Yes                | heart   | 1 week                    | 0%          | n.d.                  | n.d.    |
| 14                                  | Yes | Yes                  | nil        | n.d.                                                      | Yes                            | Yes                   | nil                | Yes     | 1 week                    | 73%         | n.d.                  | n.d.    |
| 15                                  | Yes | Yes                  | Yes        | 24 weeks                                                  | Yes                            | Yes                   | Yes                | nil     | 1 week                    | 80% pred    | n.d.                  | n.d.    |
| <b>Sitagliptin Tolerant Group</b>   |     |                      |            |                                                           |                                |                       |                    |         |                           |             |                       |         |
| 16*                                 | Yes | Yes                  | nil        | 12 weeks                                                  | Spring                         | Spring                | Spring             | Spring  | 2 weeks                   | 74% pred    | n.d.                  | n.d.    |
| 17                                  | Yes | Yes                  | nil        | 8 weeks                                                   | nil                            | Viral                 | nil                | nil     | 8 weeks                   | n.d.        | n.d.                  | n.d.    |
| 18*                                 | Yes | Yes                  | Yes        | nil                                                       | nil                            | nil                   | nil                | nil     | nil                       | n.d.        | n.d.                  | n.d.    |
| 19                                  | Yes | Yes                  | nil        | nil                                                       | nil                            | nil                   | nil                | nil     | nil                       | n.d.        | n.d.                  | n.d.    |
| 20                                  | Yes | nil                  | nil        | nil                                                       | nil                            | nil                   | nil                | nil     | nil                       | n.d.        | n.d.                  | n.d.    |
| 21                                  | Yes | nil                  | nil        | nil                                                       | nil                            | nil                   | nil                | nil     | nil                       | n.d.        | n.d.                  | n.d.    |
| 22                                  | nil | nil                  | nil        | nil                                                       | nil                            | nil                   | nil                | nil     | nil                       | 95% pred    | n.d.                  | n.d.    |
| 23                                  | nil | nil                  | nil        | nil                                                       | nil                            | nil                   | nil                | nil     | nil                       | 107% pred   | n.d.                  | n.d.    |
| 24                                  | nil | nil                  | nil        | nil                                                       | nil                            | nil                   | nil                | nil     | nil                       | n.d.        | n.d.                  | n.d.    |
| 25                                  | nil | nil                  | nil        | nil                                                       | nil                            | nil                   | nil                | nil     | nil                       | n.d.        | n.d.                  | n.d.    |
| 26                                  | nil | nil                  | nil        | nil                                                       | nil                            | nil                   | nil                | nil     | nil                       | n.d.        | n.d.                  | n.d.    |
| 27                                  | nil | nil                  | nil        | nil                                                       | nil                            | nil                   | nil                | nil     | nil                       | n.d.        | n.d.                  | n.d.    |
| 28                                  | nil | nil                  | nil        | nil                                                       | nil                            | nil                   | nil                | nil     | nil                       | n.d.        | n.d.                  | n.d.    |
| 29                                  | nil | nil                  | nil        | nil                                                       | nil                            | nil                   | nil                | nil     | nil                       | n.d.        | n.d.                  | n.d.    |
| 30                                  | nil | nil                  | nil        | nil                                                       | nil                            | nil                   | nil                | nil     | nil                       | n.d.        | n.d.                  | n.d.    |
| 31                                  | nil | nil                  | nil        | nil                                                       | nil                            | nil                   | nil                | nil     | nil                       | n.d.        | n.d.                  | n.d.    |
| 32                                  | nil | nil                  | nil        | nil                                                       | nil                            | nil                   | nil                | nil     | nil                       | Restriction | n.d.                  | n.d.    |
| 33                                  | nil | nil                  | nil        | nil                                                       | nil                            | nil                   | nil                | nil     | nil                       | n.d.        | n.d.                  | n.d.    |
| <b>Legend</b>                       |     |                      |            |                                                           |                                |                       |                    |         |                           |             |                       |         |
| Sitagliptin intolerant              |     | Sitagliptin tolerant |            | Allergic rhinitis, allergy treatment and ACEI intolerance |                                |                       | Timing of symptoms |         | Symptoms                  | % Δ PEFR    | Sitagliptin Challenge |         |
